# Supplementary material
Source: PubMed Central journal article supplement (PMC6099363)

**A**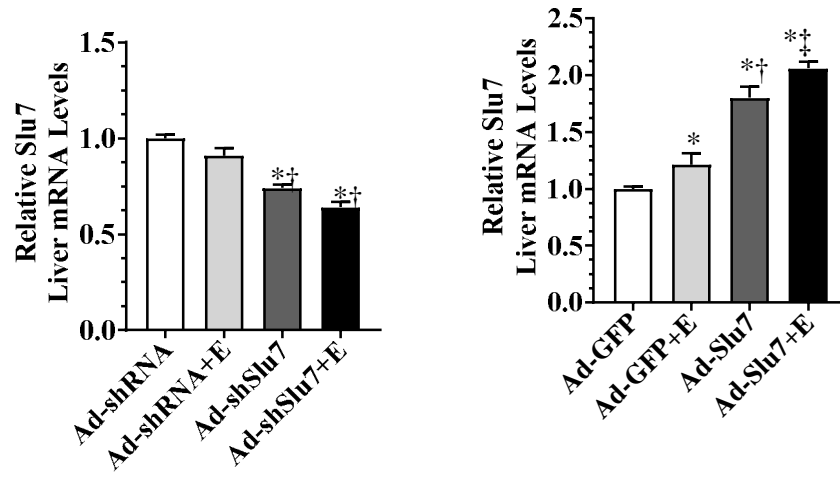**B**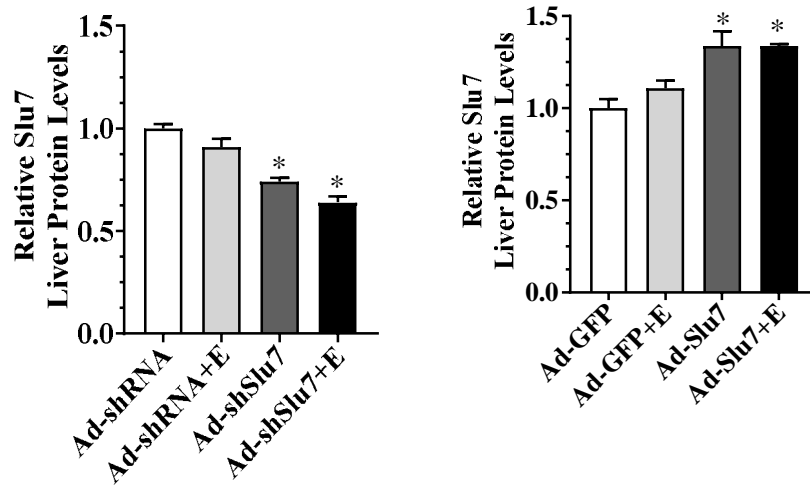**Supplementary Figure 1**

Supplement: mmc1.pdf [file mmc1.pdf]

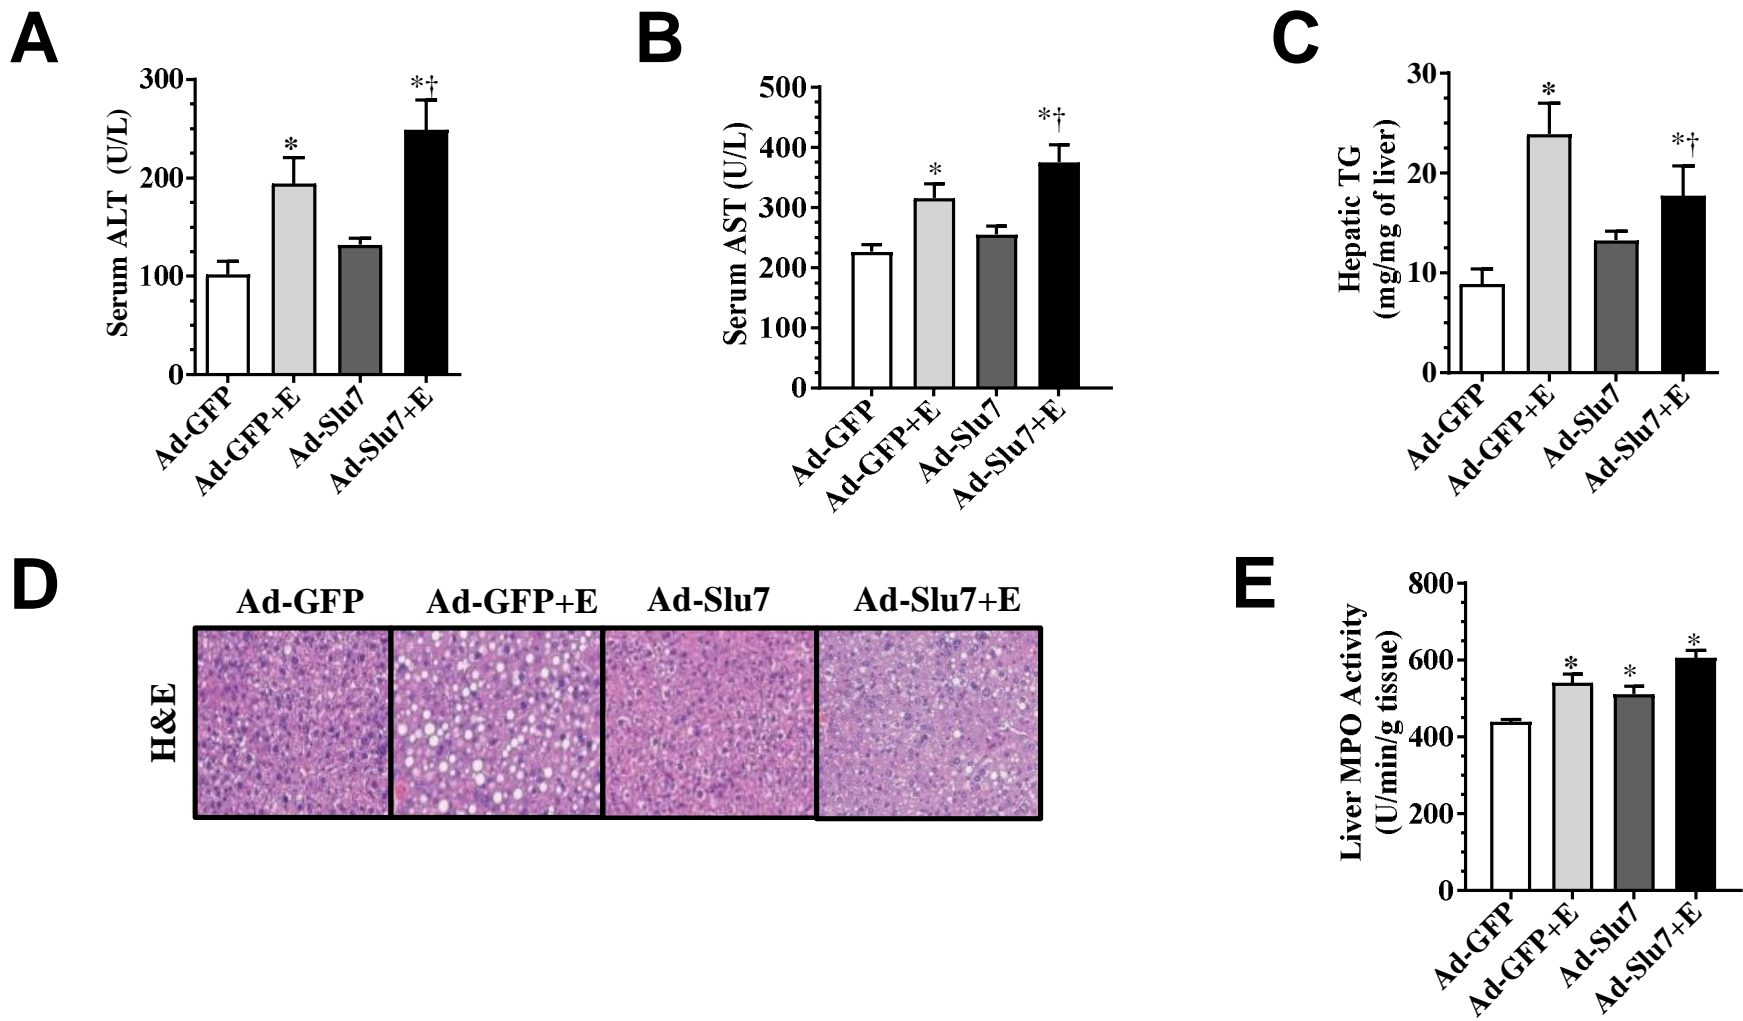

Supplementary Figure 2

Supplement: mmc2.pdf [file mmc2.pdf]

**A**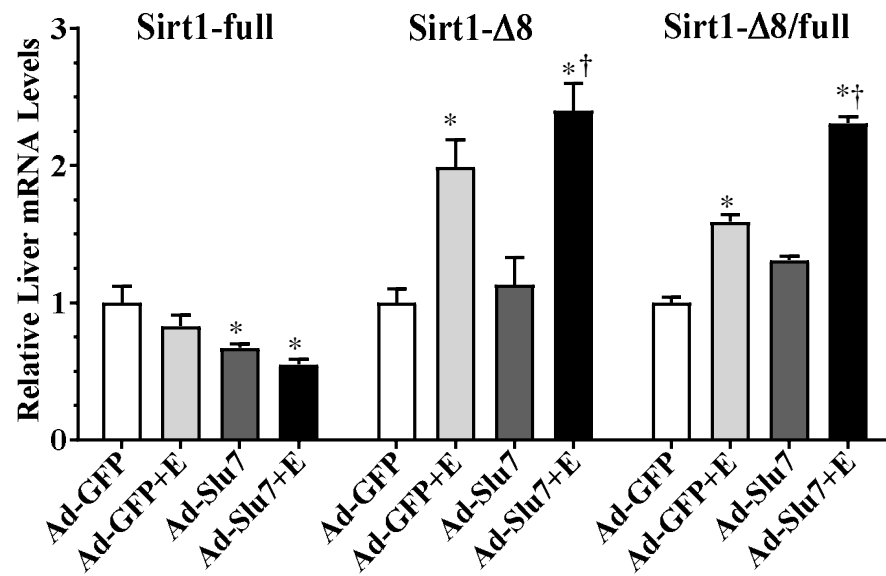**B**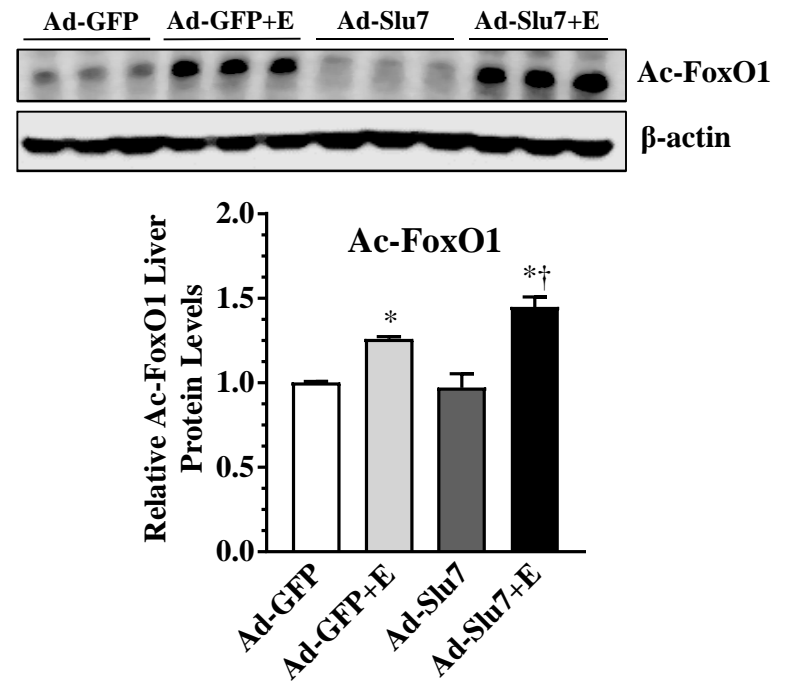**Supplementary Figure 4**

Supplement: mmc4.pdf [file mmc4.pdf]

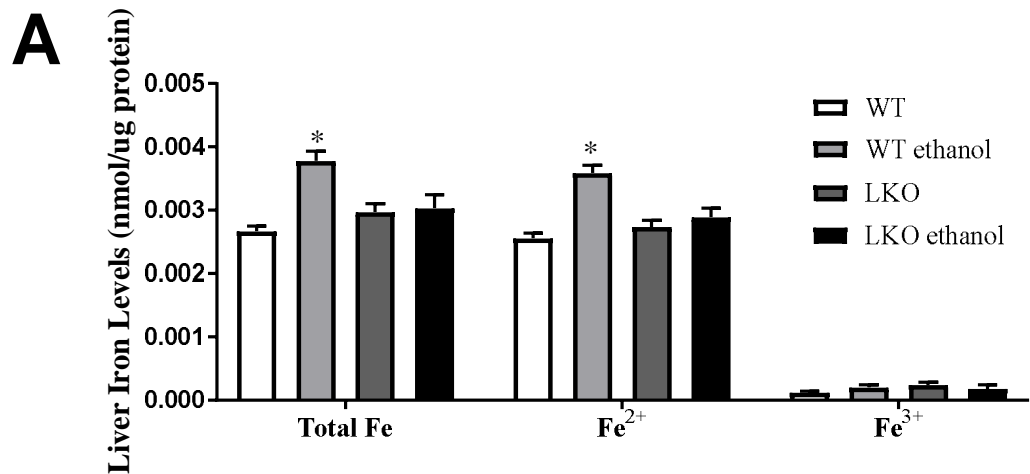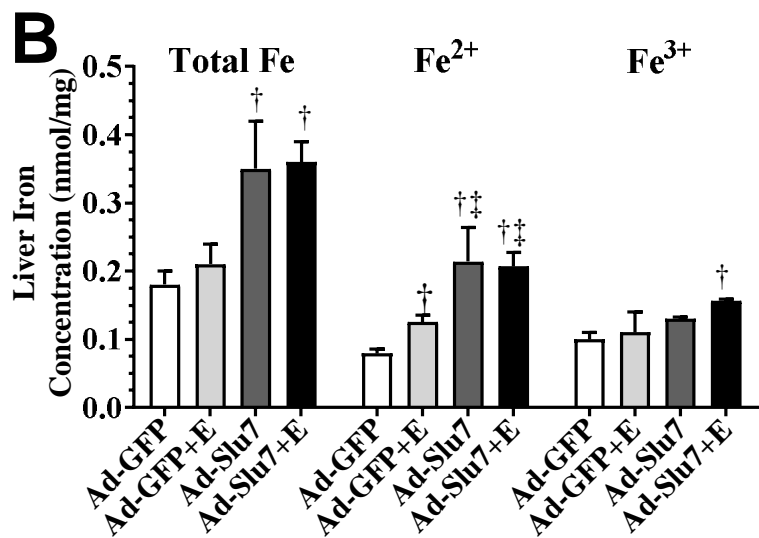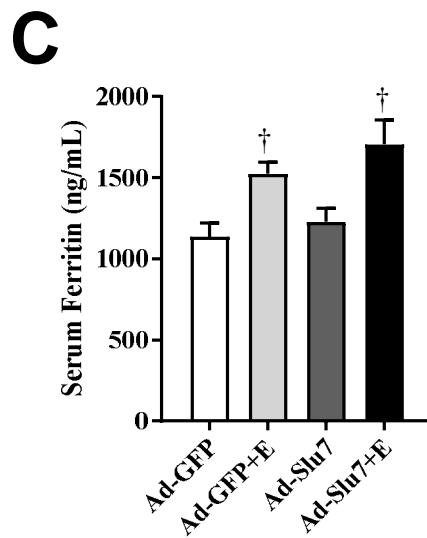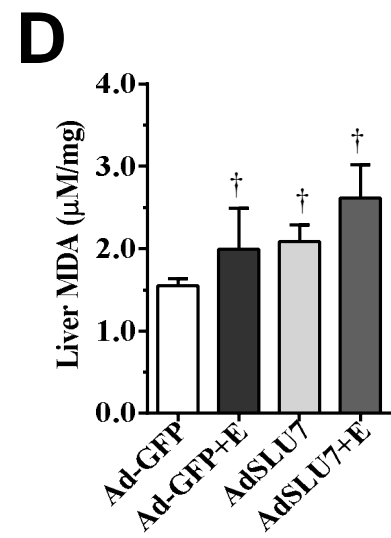

**Supplementary Figure 5**

Supplement: mmc5.pdf [file mmc5.pdf]
